# Supplementary material
Source: MDPI journal article supplement (https://www.mdpi.com/2073-4344/9/12/1072)
Supplement: s1 [file s1]

## Supplementary Material (Figures S1 –S6 and Table S1)

The manuscript with the title

*“On the formation mechanism and model of Surface nanoscale Kirkendall effect on the Au catalyst island/ GaAs substrate by thermal VLS method with two steps temperature mode”*

By Khac An DAO\*<sup>1,2</sup> et al.

Sending to Catalysts , MDPI

**Figure S1:** The SNKE was not formed at the thin Au catalyst island ( $< 20$  nm) between two Au catalyst islands (b) on the **sample S1**, the NWs have grown regularly by thermal VLS method

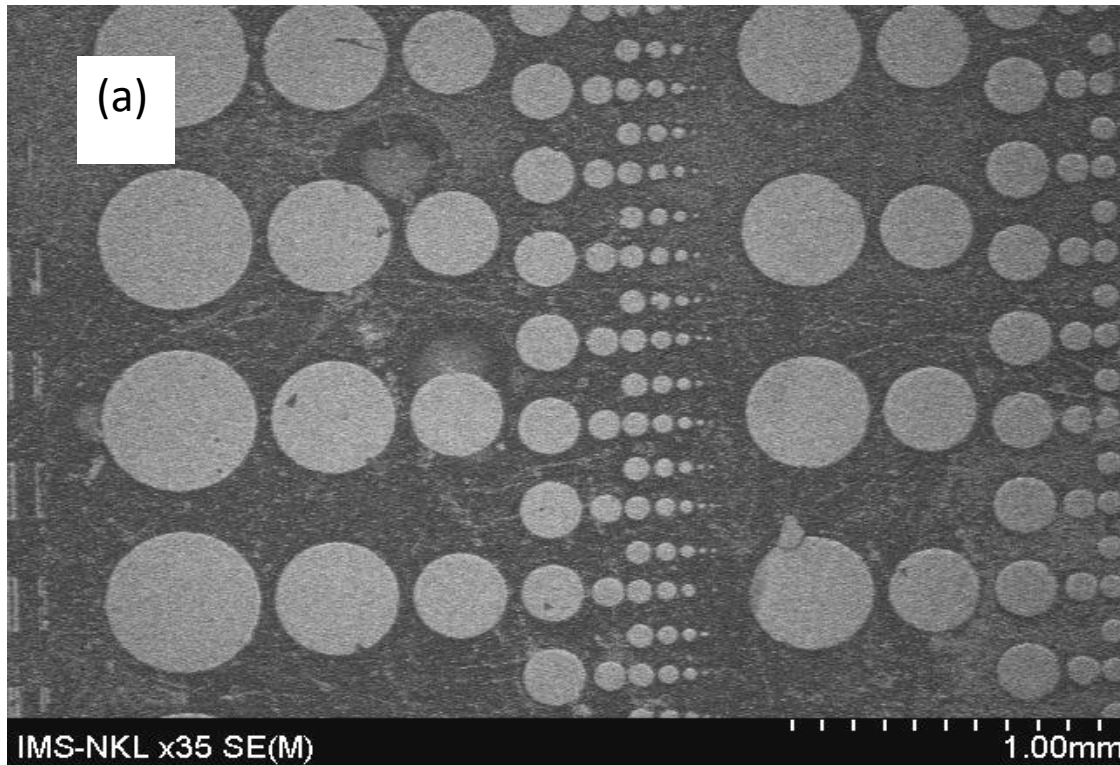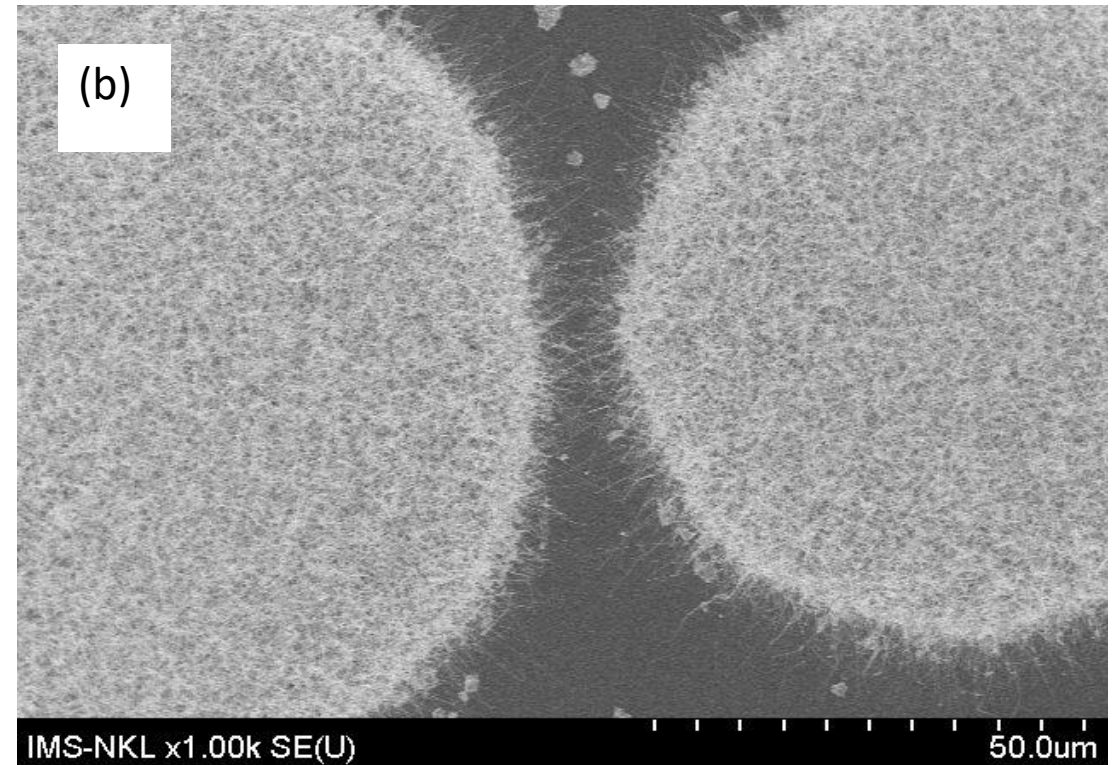

**Figure S2:** SEM micrographs of surface nanoscale Au/Ga/O clusters (SNCs) formed inside the Au catalyst island on **Sample S2**. The SNCs have the sizes of from 30 nm to about 100 nm (b,c,d) . Several NWs are began to grow (b) .

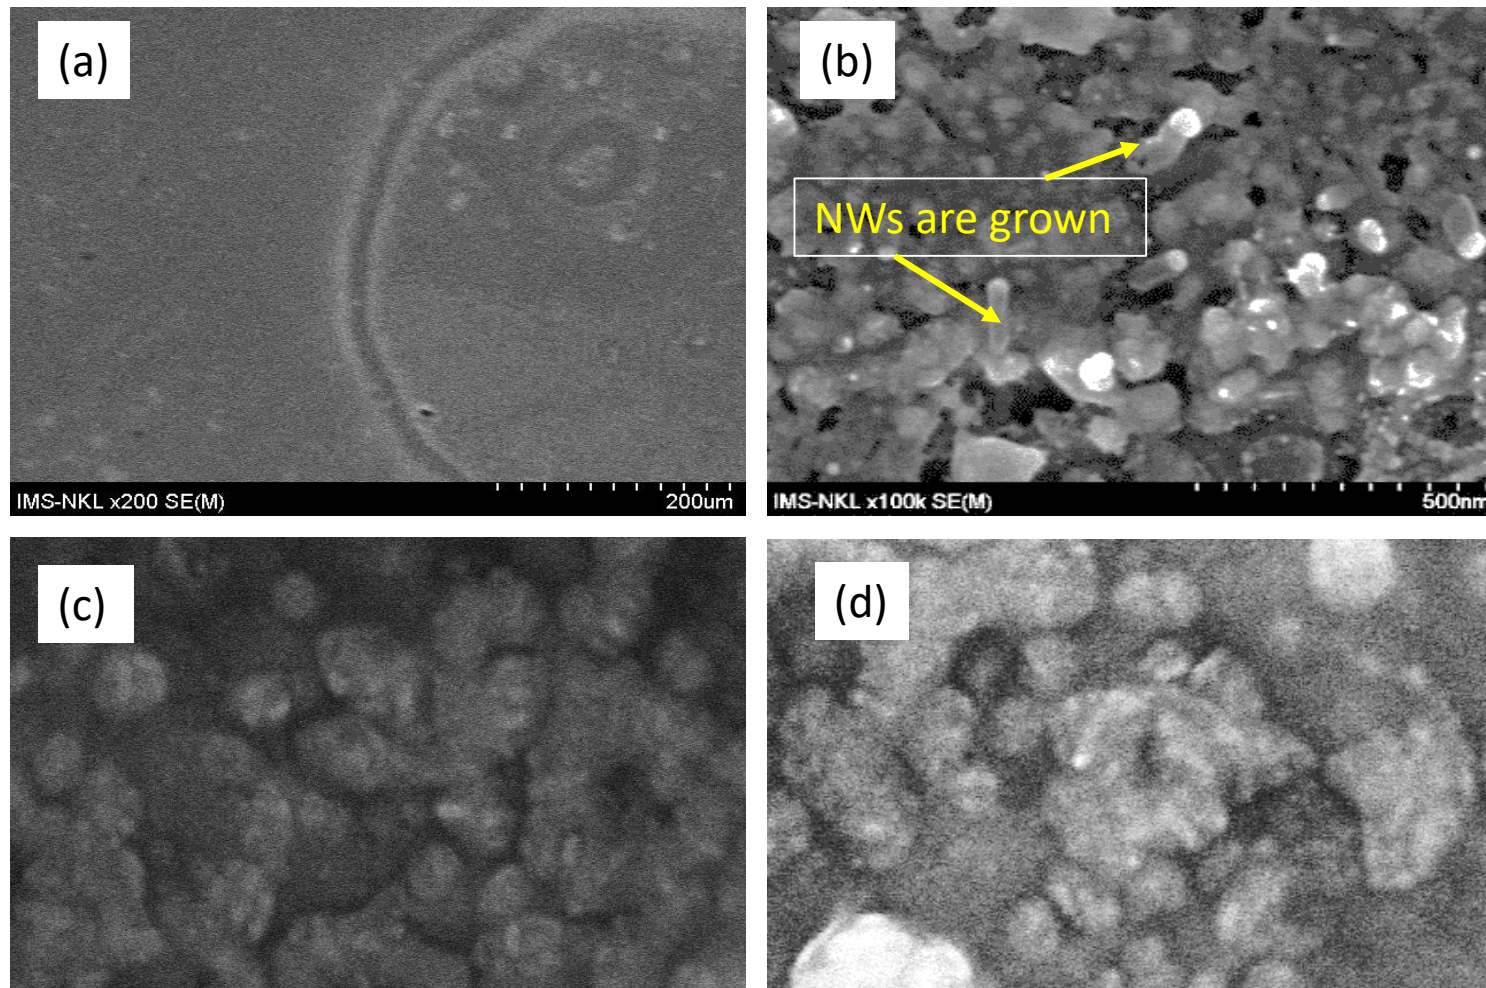

**Figure S3:** The different magnified SEM micrographs of the different corners of the bare GaAs hole formed on the place of the former Au catalyst island on the **sample S6**, where SNKE completely formed, simultaneously the mixed nanomaterials (NPs, NWs, NRs) have grown on GaAs surface along the radius direction (arrows direction)

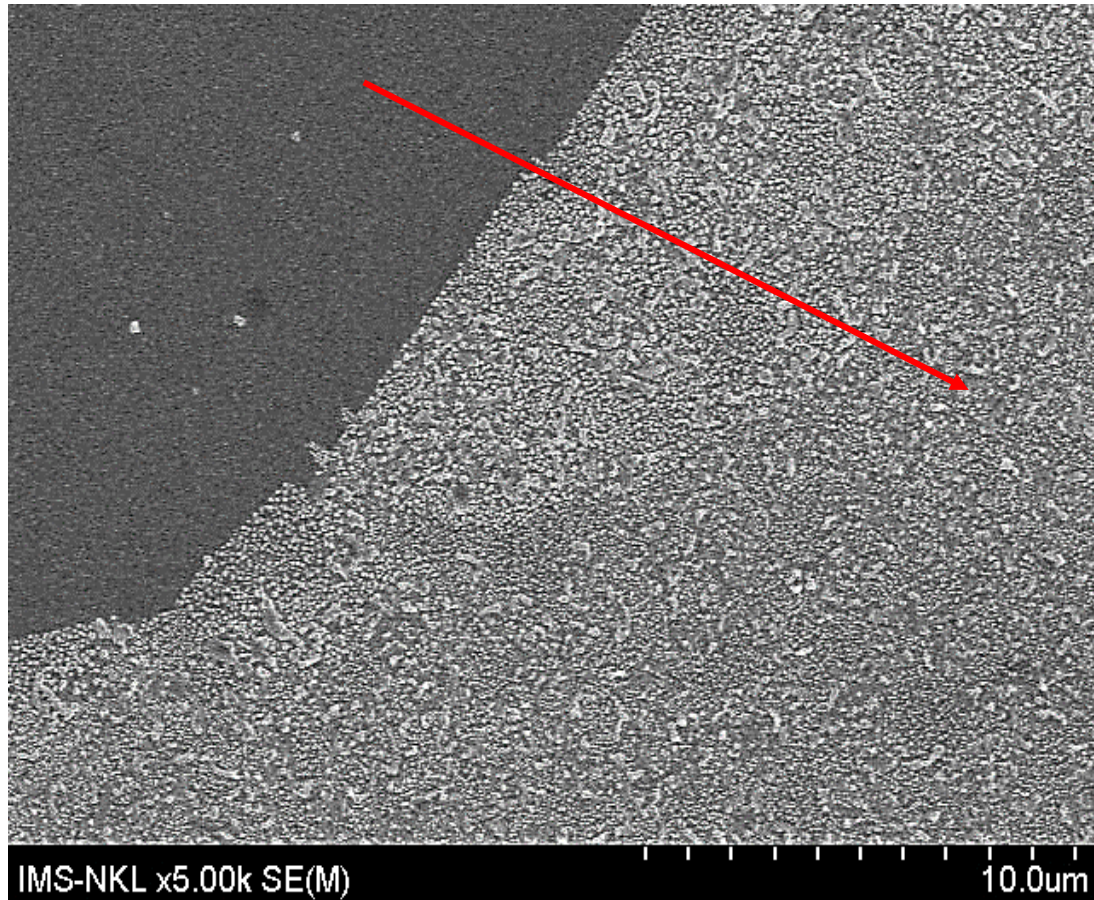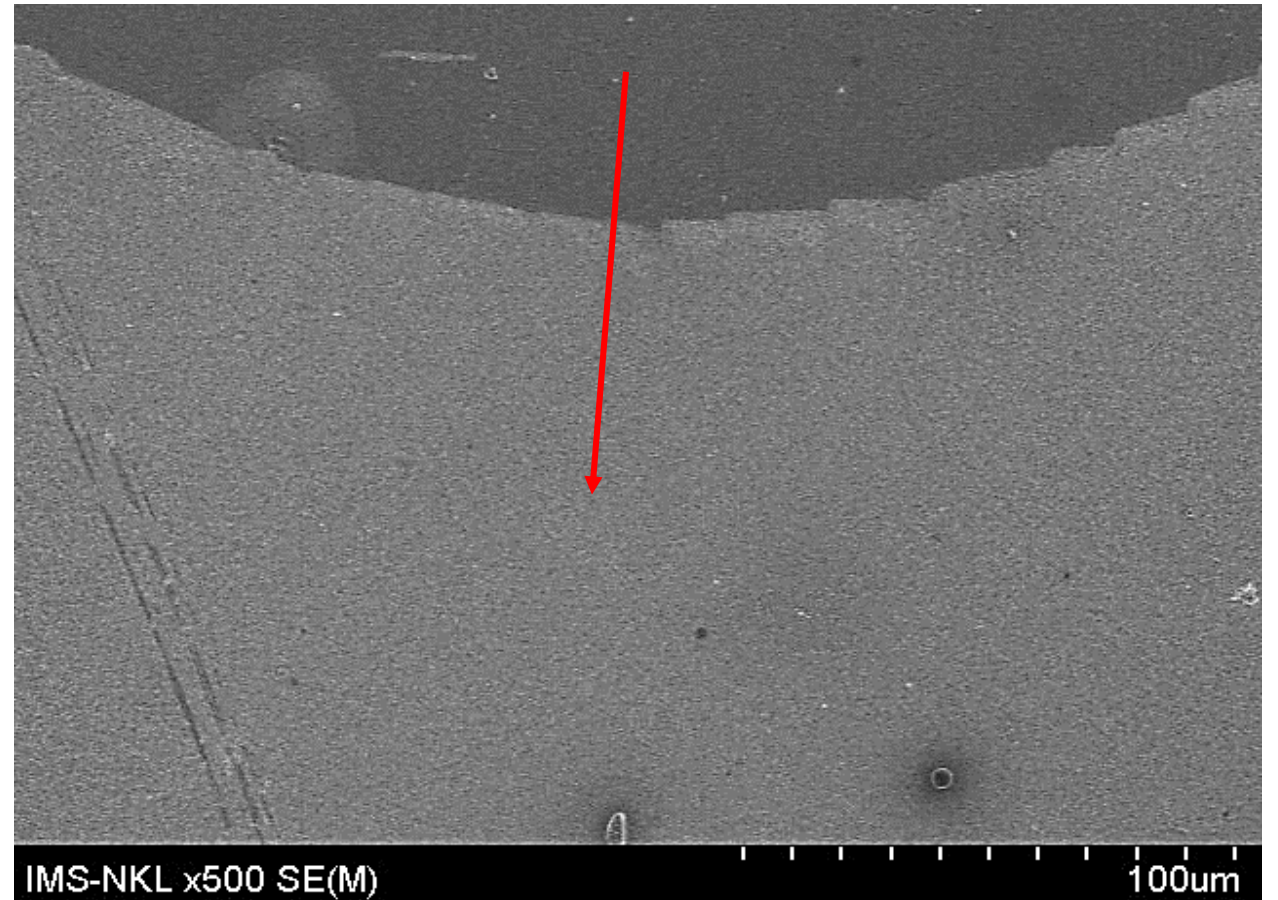

**Figure S4:** The different magnified SEM micrographs of NWs with the weakened bases and big tips (spheres) on **Sample S3** that are diffused outward and grown

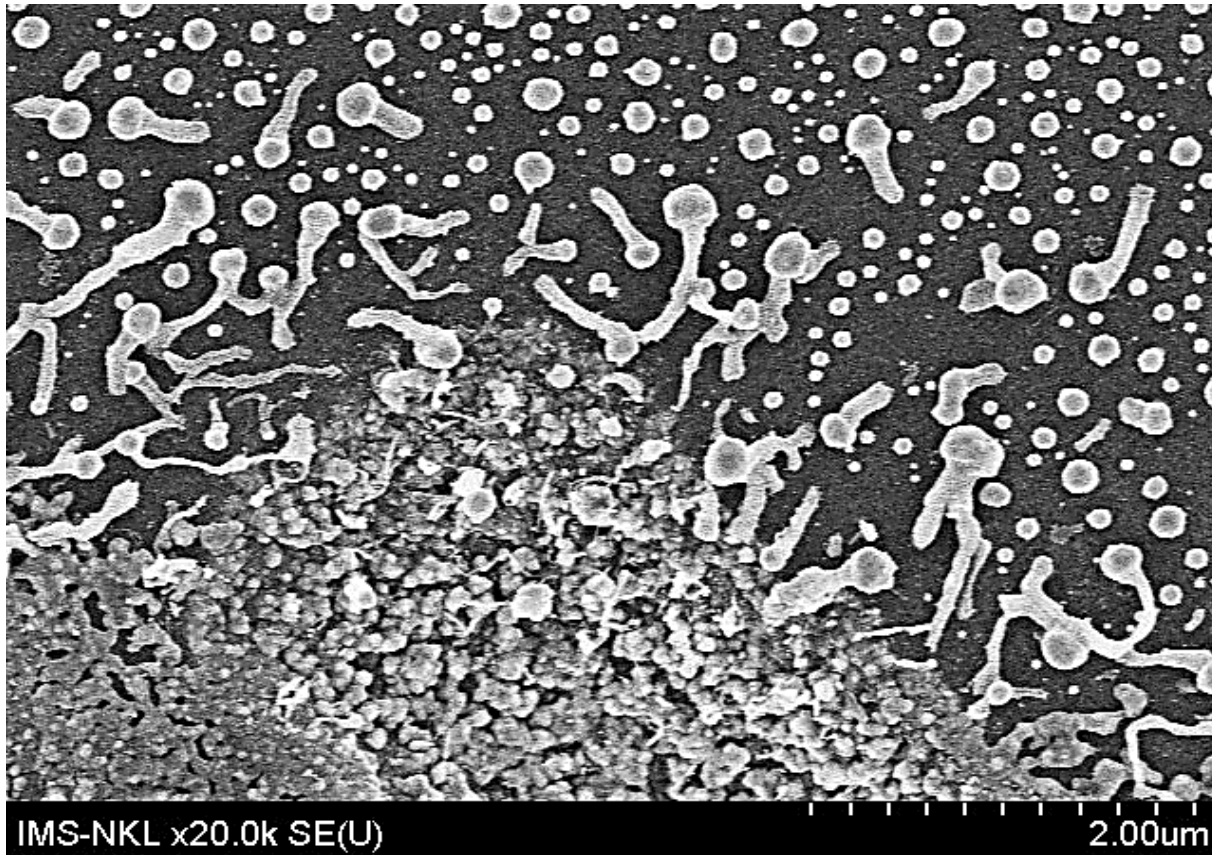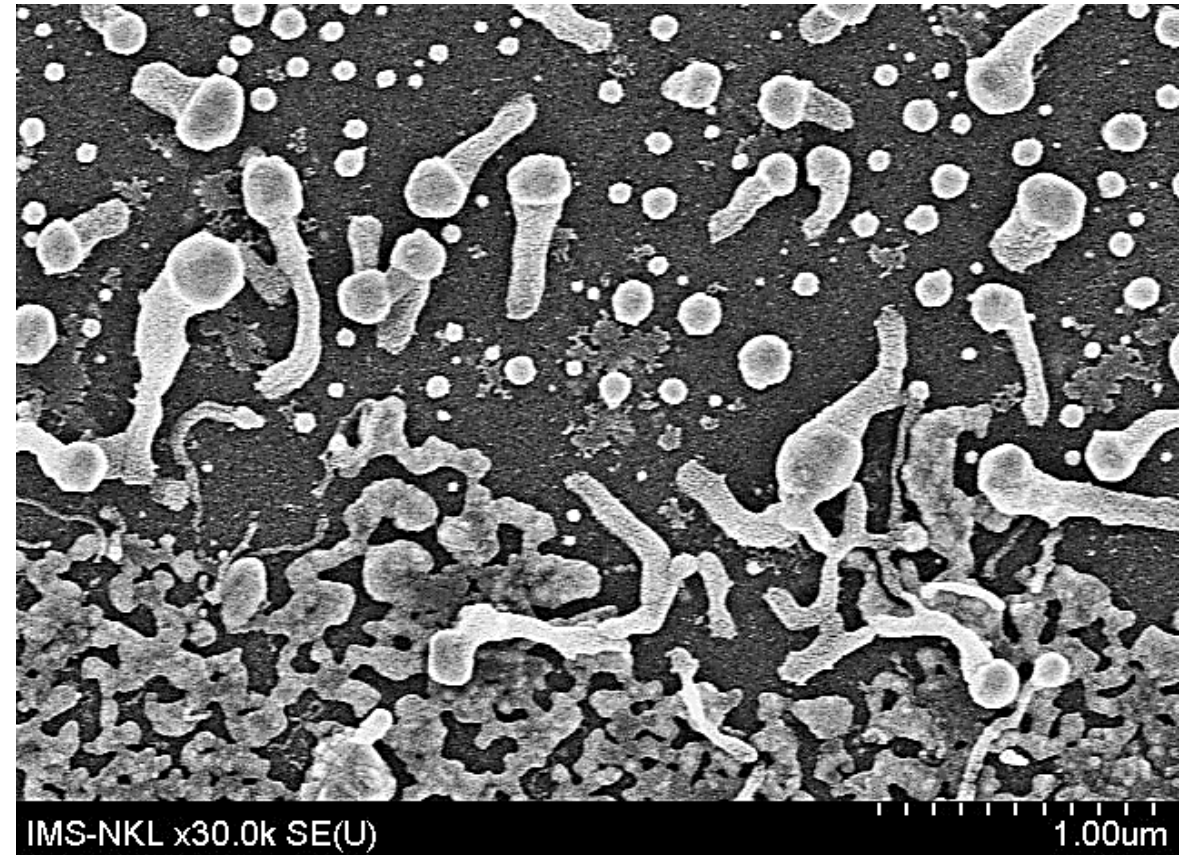

**Figure S5:** The different magnified SEM micrographs of NWs grown on the outside of Au catalyst island/strip on **Sample S5** with weaken bases and big tips (spheres) located on the NWs tops

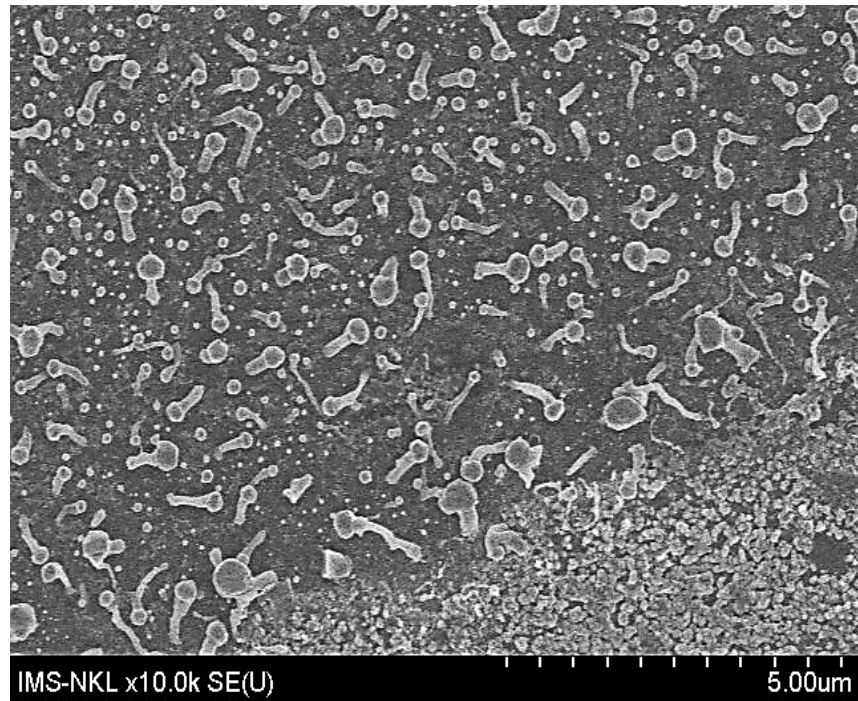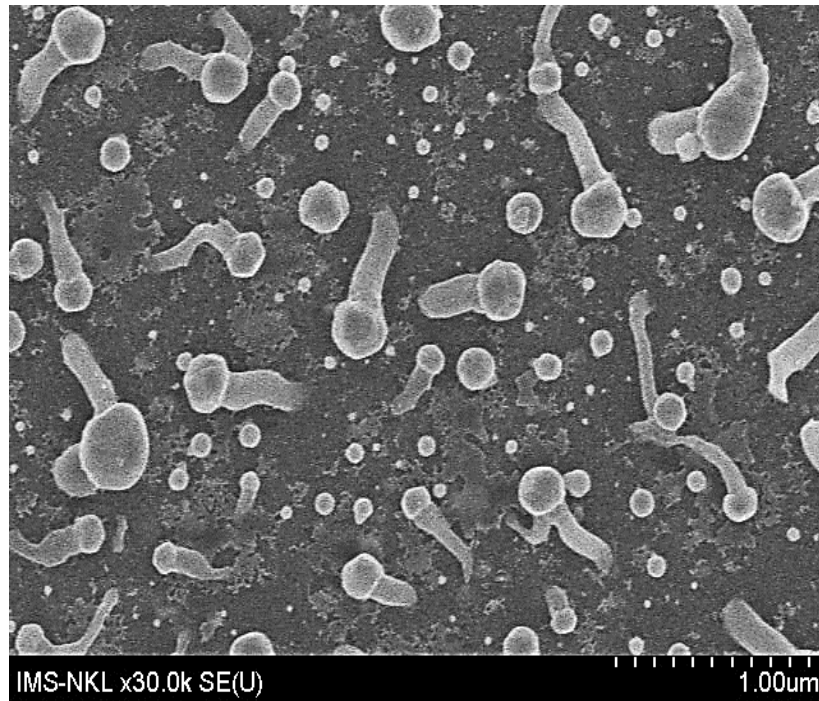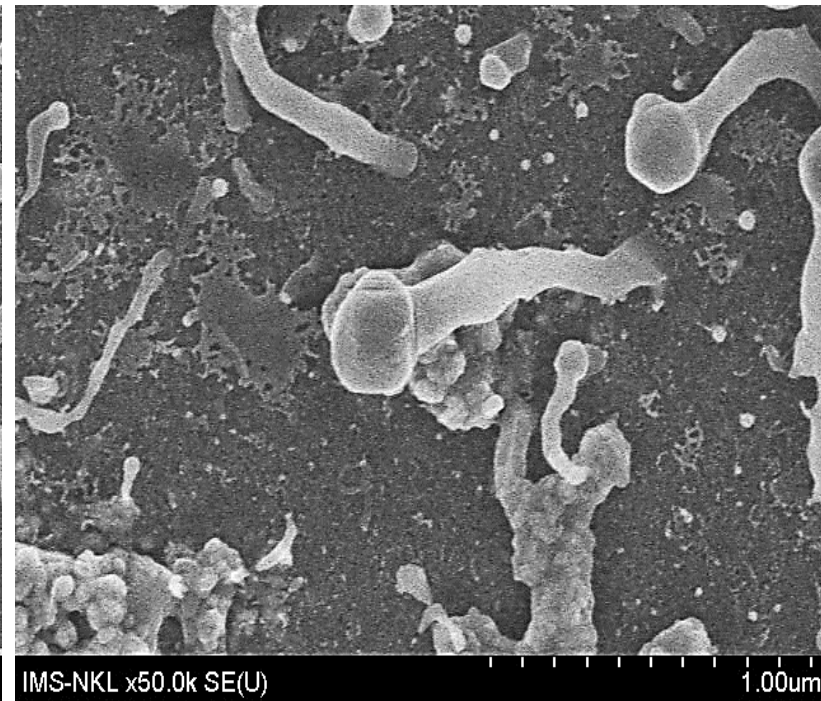

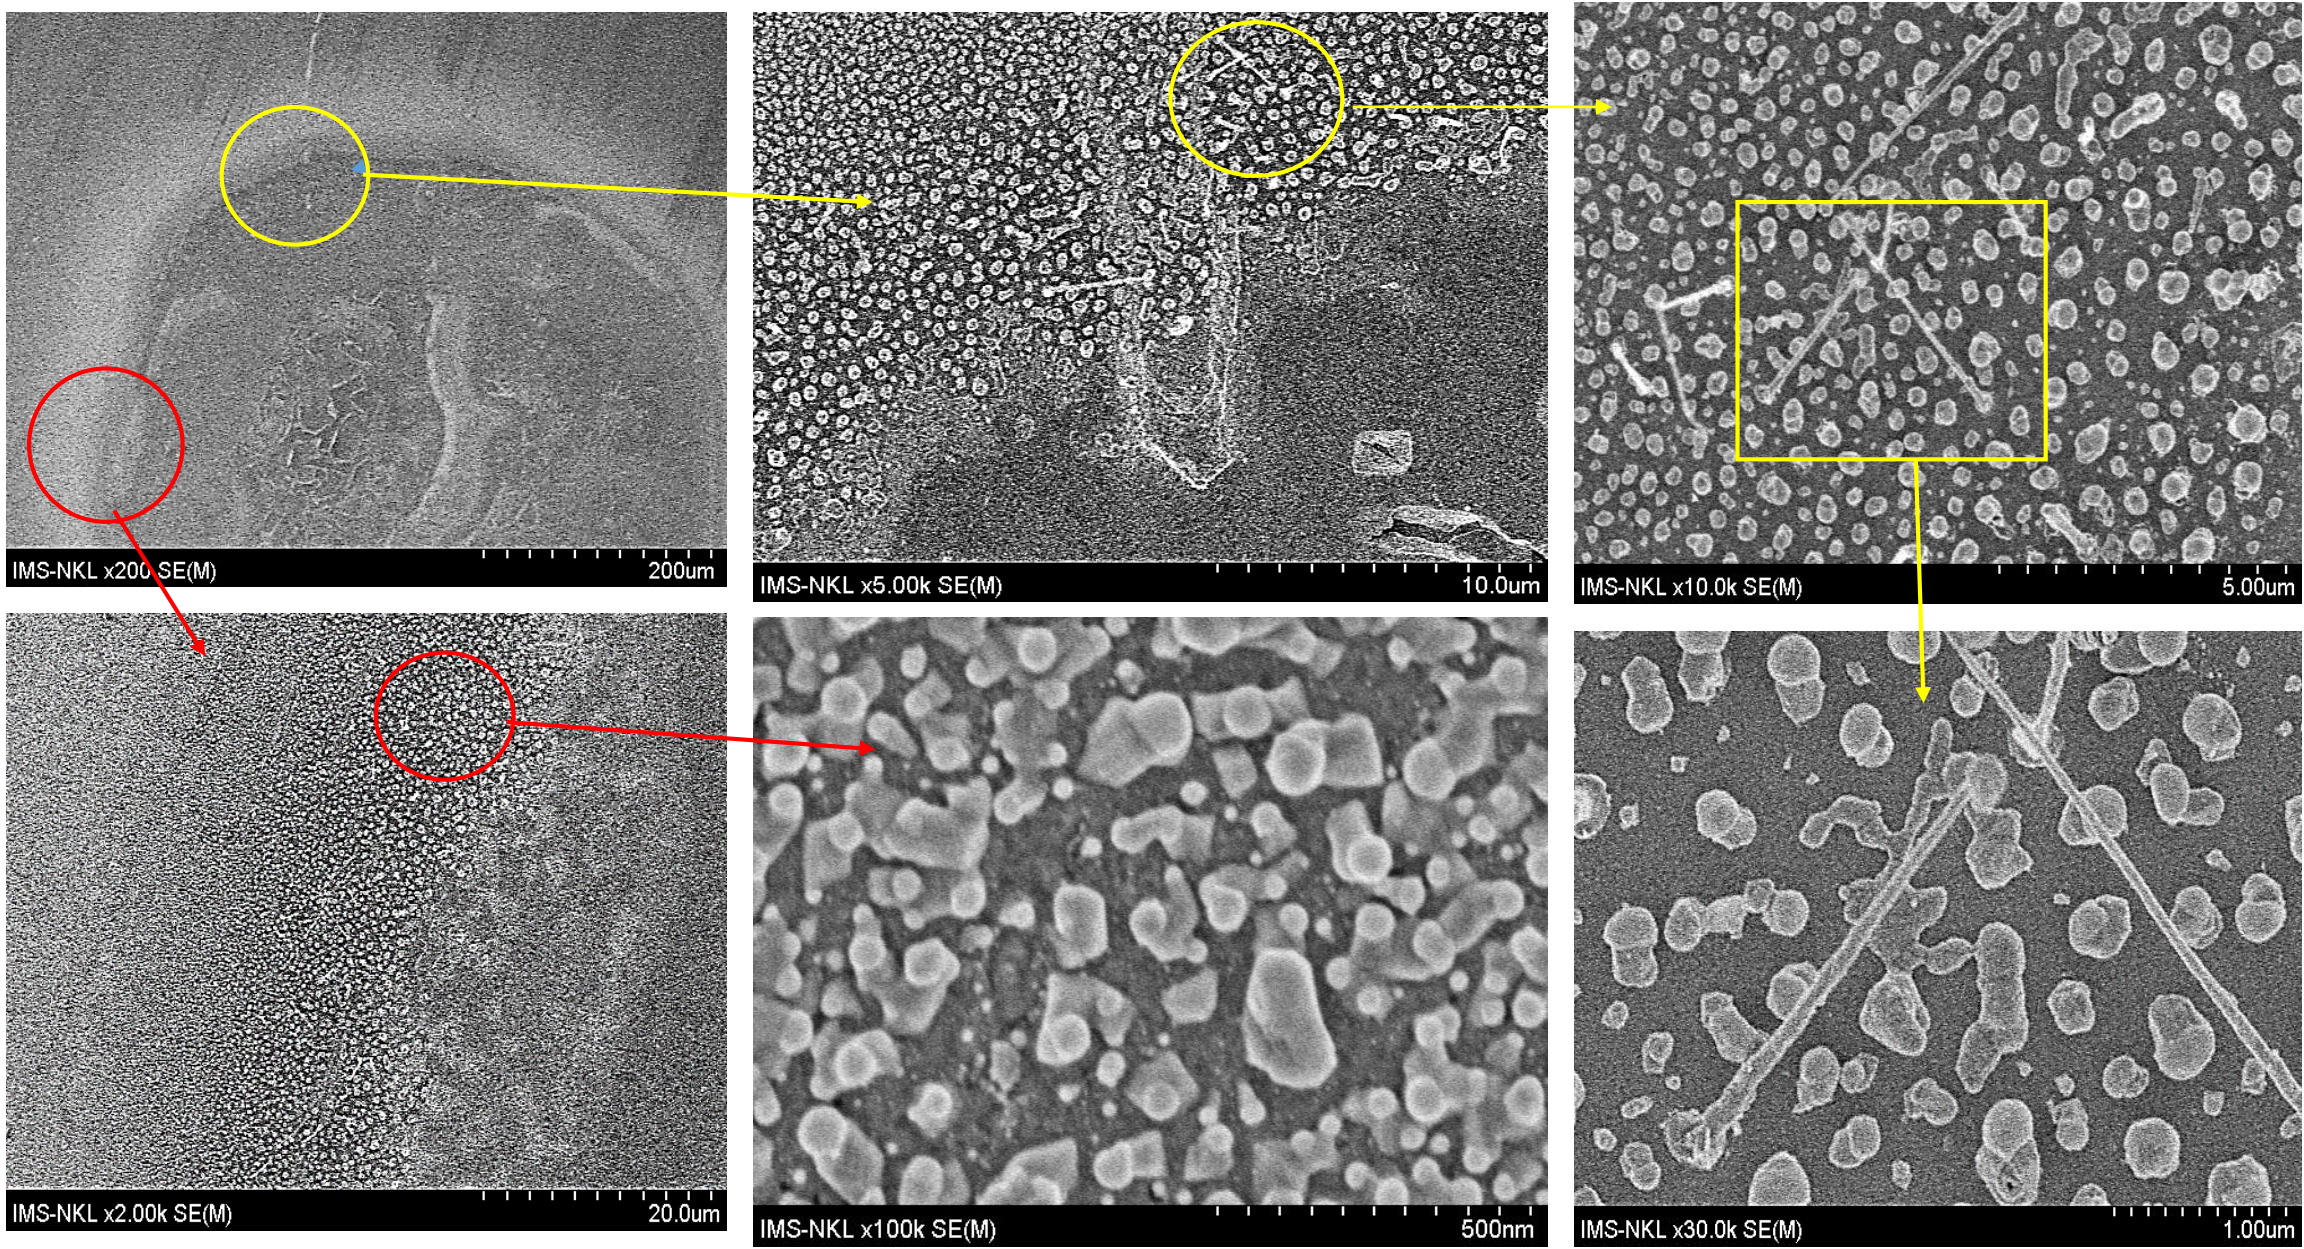

**Figure S6 :** Several SEM micrographs on the Sample S10 more in detail concerning Fig.2

**Table S1.** The symbols of several typical samples and technological conditions using in the experiments by the VLS method with two steps temperature mode in the  $10^{-1}$ - $10^{-2}$  torr low vacuum closed tube for investigation of the SNKE formation on Au island/GaAs substrate

| GaAs labeled Samples | Au islands thickness (nm) | $t_1$ (mins) | $T_1$ (°C) | $t_2$ (mins) | $t_3$ (mins) | $T_2$ (°C) | $t_4$ (mins) |
|----------------------|---------------------------|--------------|------------|--------------|--------------|------------|--------------|
| S1                   | 20                        | 82           | 410        | 20           | 34           | 610        | 30           |
| S2                   | 35                        | 88           | 440        | 20           | 40           | 640        | 30           |
| S3                   | 35                        | 82           | 410        | 20           | 40           | 620        | 30           |
| S5                   | 35                        | 82           | 410        | 20           | 40           | 620        | 30           |
| S6                   | 70                        | 82           | 410        | 20           | 48           | 650        | 60           |
| S7                   | 70                        | 82           | 410        | 20           | 48           | 650        | 90           |
| S9                   | 1000                      | 82           | 410        | 20           | 42           | 620        | 30           |
| S10                  | 1000                      | 88           | 440        | 20           | 40           | 640        | 30           |
| S 15                 | 220                       | 82           | 410        | 20           | 48           | 650        | 30           |
